# Supplementary material for: Rapid Preparation of MWCNTs/Epoxy Resin Nanocomposites by Photoinduced Frontal Polymerization
Source: MDPI journal article supplement (doi:10.3390/ma13245838), 2020-12-21
Supplement: s1 [file s1]

# Supplementary Materials: Rapid Preparation of MWCNTs/Epoxy Resin Nanocomposites by Photoinduced Frontal Polymerization

Guofeng Hu <sup>1</sup>, Wanli Fu <sup>1,2</sup>, Yumin Ma <sup>1</sup>, Jianping Zhou <sup>1,3,\*</sup>, Hongbo Liang <sup>1,3</sup>, Xinmei Kang <sup>4</sup> and Xiaolin Qi <sup>4</sup>

<sup>1</sup> School of Material Science and Engineering, Nanchang Hangkong University, Nanchang 330063, China; 1801085204012@stu.nchu.edu.cn (G.H.); 70965@nchu.edu.cn (W.F.); maym@hollowlite.com (Y.M.); lhongbo@nchu.edu.cn (H.L.)

<sup>2</sup> State-owned Assets Management Division, Nanchang Hangkong University, Nanchang 330063, China;

<sup>3</sup> Jiangxi Provincial Engineering Research Center for Surface Technology of Aeronautical Materials, Nanchang Hangkong University, Nanchang 330063, China

<sup>4</sup> Aviation Key Laboratory of Science and Technology on Life-support Technology, Xiangyang 441000, China; kangkang198306@163.com (X.K.); ajian421@126.com (X.Q.)

\* Correspondence: zhoujp@nchu.edu.cn

Received: 25 October 2020; Accepted: 15 December 2020; Published: 21 December 2020

## Rapid Preparation of MWCNTs/Epoxy Resin Nanocomposites by Photoinduced Frontal Polymerization

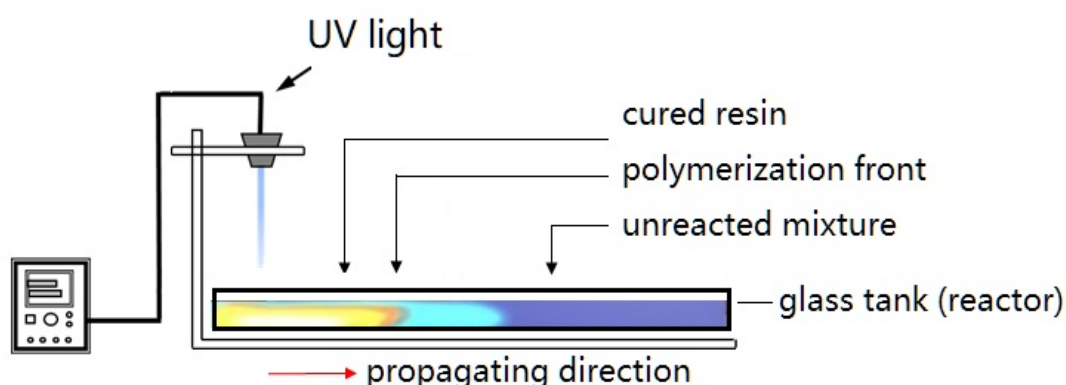

**Figure S1.** Scheme of the device used for photoinduced frontal polymerization.

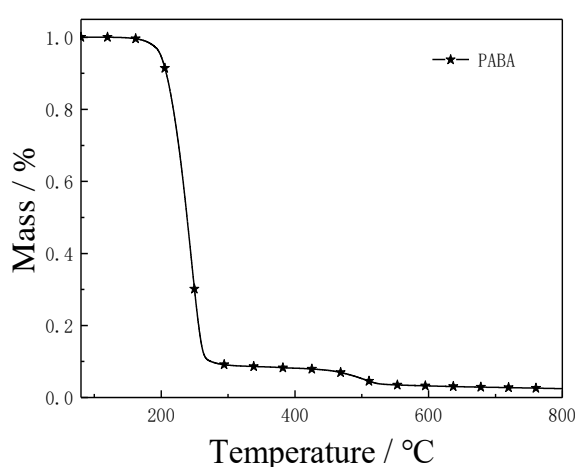

**Figure S2.** TGA curves of pure epoxy resin.

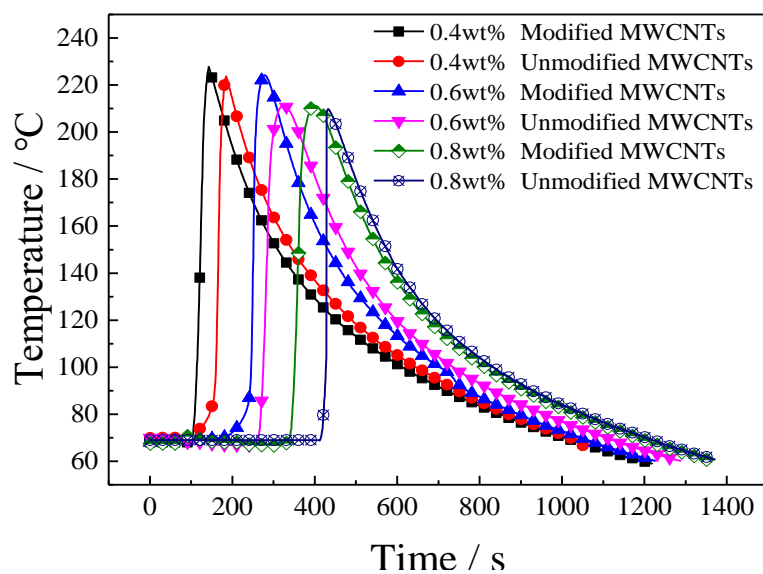

**Figure S3.** The temporal distribution of temperature of the unmodified MWCNTs/epoxy and PABA-modified MWCNTs/epoxy reaction system with different filler loading.

**Publisher's Note:** MDPI stays neutral with regard to jurisdictional claims in published maps and institutional affiliations.

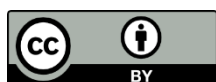

© 2020 by the authors. Licensee MDPI, Basel, Switzerland. This article is an open access article distributed under the terms and conditions of the Creative Commons Attribution (CC BY) license (<http://creativecommons.org/licenses/by/4.0/>).
